# Supplementary material for: Photochemical synthesis of size-tailored hexagonal ZnS quantum dots
Source: Royal Society of Chemistry journal article supplement (doi:10.1039/c4cc09222h), 2015-01-01

## Photochemical synthesis of size-tailored hexagonal ZnS quantum dots

Carlos M. Gonzalez,<sup>a</sup> Wei-Chen Wu,<sup>b</sup> Joseph Tracy,<sup>b</sup> Benjamin Martin<sup>a\*</sup>

<sup>a</sup> NSF-PREM Center for Interfaces in Materials  
Department of Chemistry and Biochemistry, Texas State University  
601 University Drive  
San Marcos, TX 78666

<sup>b</sup> North Carolina State University  
Department of Materials Science and Engineering  
911 Partners Way  
Raleigh, NC 27695

**Figure S1.** Histograms for ZnS QDs population in Figures 1a-c.

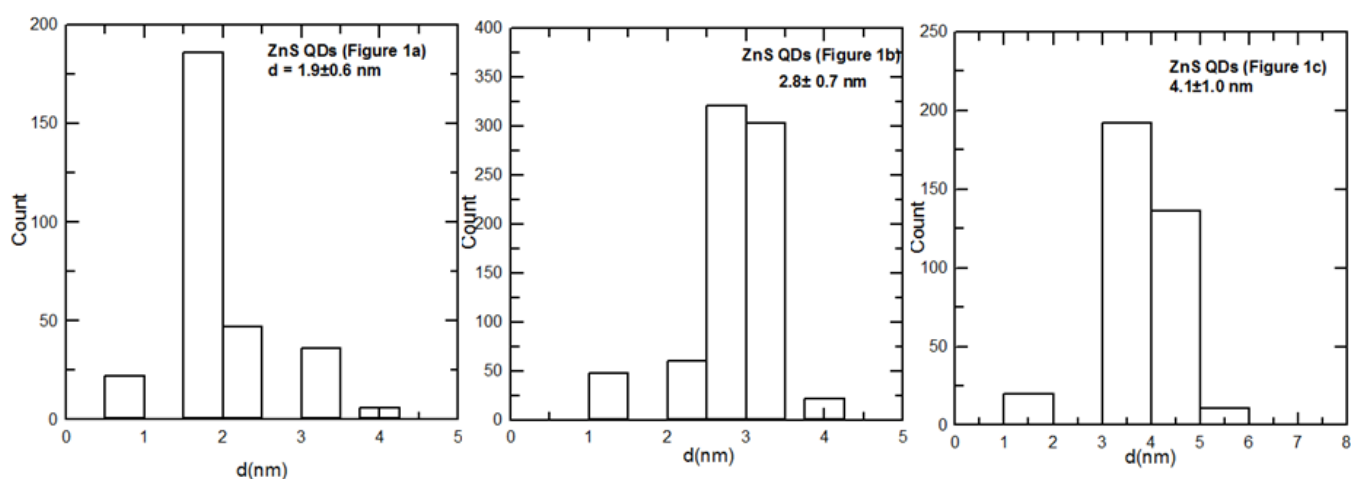

**Figure S2.** XRD of a sample of ZnS QDs (after 3 cycles of centrifugation/rinsing) left overnight at 200 °C. Reference pattern 01-079-2204 ICDD database.

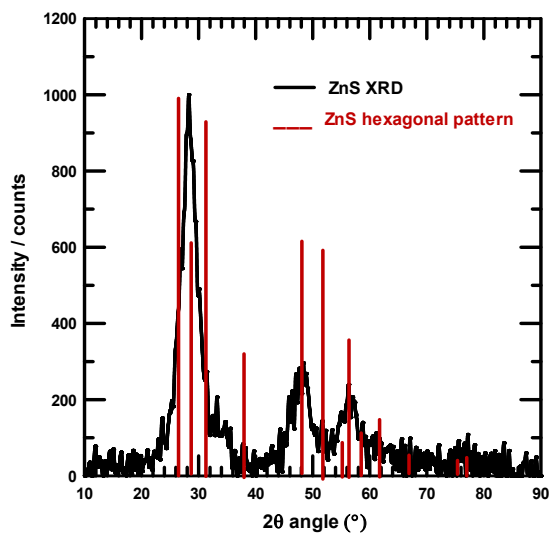

## Supporting Information

**Figure S3.** Curves for both the thermal gravimetric analysis and differential gravimetric analysis of a representative ZnS QDs sample. The temperature range was 25 – 600 °C, and the rate of increasing temperature 1 °C/min.

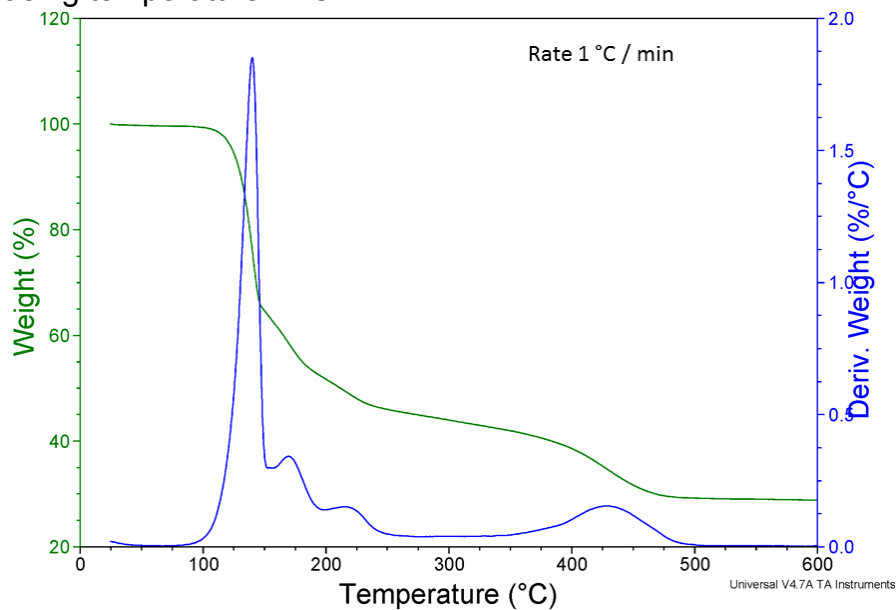

**Figure S4.** Change in UV spectra with irradiation time of a sample containing thiourea (0.1 mM) and acetone (10 mM) in isopropanol.

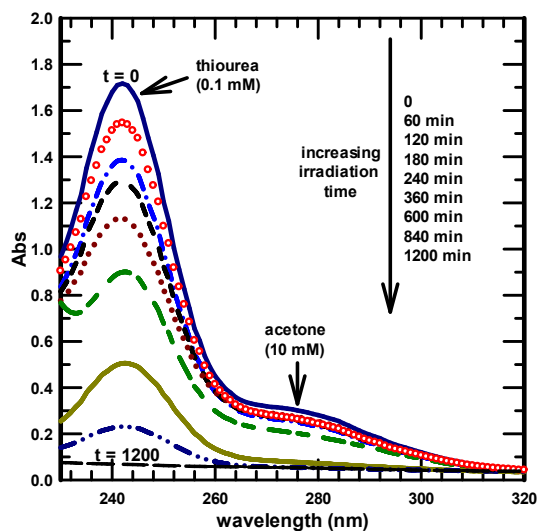

Supplement: c4cc09222h1.pdf [file c4cc09222h1.pdf]
